# Supplementary material
Source: HighWire-hosted journal article supplement (https://openheart.bmj.com/content/9/1/e001881)
Supplement: inline-supplementary-material-1 [file inline-supplementary-material-1.pdf]

**Drivers and Outcomes of Variation in Surgical versus Transcatheter Aortic Valve****Replacement in Ontario, Canada: a population-based study****SUPPLEMENTAL MATERIAL****Figure S1:** Number of procedures by hospital and fiscal year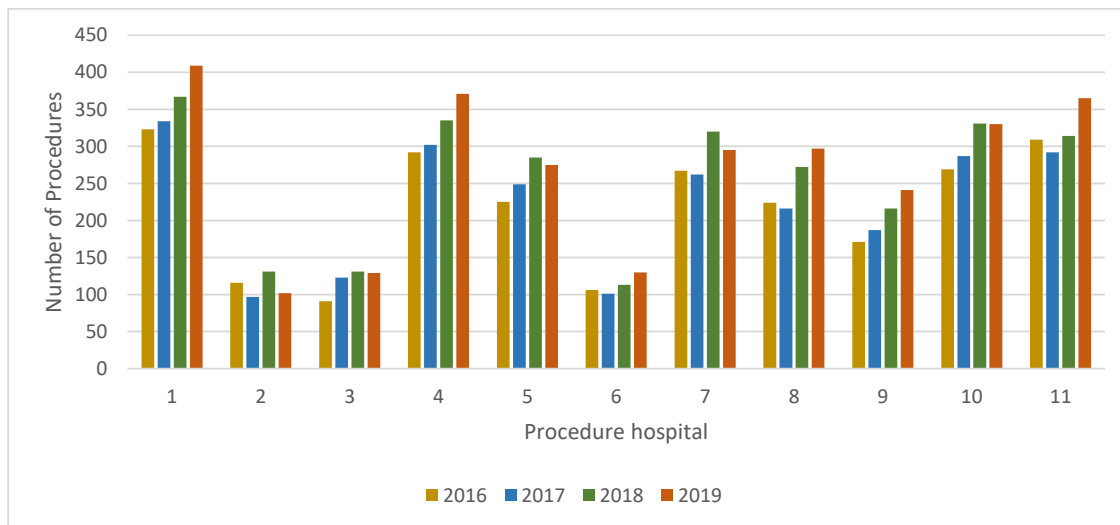

**Table S1:** Baseline characteristics by TAVR/SAVR ratio tertiles

| Baseline Characteristic             | Total<br>N=10,602    | TAVR/SAVR Tertiles  |                      |                      | P-value |
|-------------------------------------|----------------------|---------------------|----------------------|----------------------|---------|
|                                     |                      | Low<br>N=2,404      | Medium<br>N=4,828    | High<br>N=3,370      |         |
| <b>Demographic characteristics</b>  |                      |                     |                      |                      |         |
| Age (mean $\pm$ SD)                 | 75.70 $\pm$<br>10.10 | 74.77 $\pm$<br>9.70 | 75.50 $\pm$<br>10.15 | 76.64 $\pm$<br>10.23 | <.001   |
| Sex (% female)                      | 3,972<br>(37.5%)     | 842<br>(35.0%)      | 1,779<br>(36.8%)     | 1,351<br>(40.1%)     | <.001   |
| Rural Residence, N (%)              | 1,571<br>(14.8%)     | 741<br>(30.8%)      | 603<br>(12.5%)       | 227<br>(6.7%)        | <.001   |
| Income quintile, N (%)              |                      |                     |                      |                      | <.001   |
| 1                                   | 2,031<br>(19.2%)     | 476<br>(19.8%)      | 856<br>(17.7%)       | 699<br>(20.7%)       |         |
| 2                                   | 2,262<br>(21.3%)     | 529<br>(22.0%)      | 982<br>(20.3%)       | 751<br>(22.3%)       |         |
| 3                                   | 2,109<br>(19.9%)     | 465<br>(19.3%)      | 1,013<br>(21.0%)     | 631<br>(18.7%)       |         |
| 4                                   | 2,043<br>(19.3%)     | 480<br>(20.0%)      | 1,011<br>(20.9%)     | 552<br>(16.4%)       |         |
| 5                                   | 2,127<br>(20.1%)     | 446<br>(18.6%)      | 951<br>(19.7%)       | 730<br>(21.7%)       |         |
| <b>Medical Comorbidities, N (%)</b> |                      |                     |                      |                      |         |
| Congestive Heart Failure            | 5,167<br>(48.7%)     | 920<br>(38.3%)      | 2,336<br>(48.4%)     | 1,911<br>(56.7%)     | <.001   |
| Cardiac arrhythmia                  | 1,986<br>(18.7%)     | 427<br>(17.8%)      | 864<br>(17.9%)       | 695<br>(20.6%)       | 0.003   |
| Peripheral vascular disease         | 313<br>(3.0%)        | 59<br>(2.5%)        | 161<br>(3.3%)        | 93<br>(2.8%)         | 0.083   |
| Cerebrovascular disease             | 357<br>(3.4%)        | 62<br>(2.6%)        | 162<br>(3.4%)        | 133<br>(3.9%)        | 0.018   |
| COPD                                | 3,067<br>(28.9%)     | 729<br>(30.3%)      | 1,402<br>(29.0%)     | 936<br>(27.8%)       | 0.106   |
| Dementia                            | 435<br>(4.1%)        | 78<br>(3.2%)        | 191<br>(4.0%)        | 166<br>(4.9%)        | 0.005   |
| Cancer                              | 631<br>(6.0%)        | 130<br>(5.4%)       | 261<br>(5.4%)        | 240<br>(7.1%)        | 0.002   |
| Dialysis                            | 268<br>(2.5%)        | 51<br>(2.1%)        | 116<br>(2.4%)        | 101<br>(3.0%)        | 0.085   |
| Interstitial lung disease           | 92<br>(0.9%)         | 18<br>(0.7%)        | 46<br>(1.0%)         | 28<br>(0.8%)         | 0.652   |

|                                       |                  |                  |                  |                  |       |
|---------------------------------------|------------------|------------------|------------------|------------------|-------|
| Liver disease                         | 167<br>(1.6%)    | 31<br>(1.3%)     | 73<br>(1.5%)     | 63<br>(1.9%)     | 0.195 |
| Renal disease                         | 534<br>(5.0%)    | 84<br>(3.5%)     | 223<br>(4.6%)    | 227<br>(6.7%)    | <.001 |
| Diabetes                              | 4,465<br>(42.1%) | 1,017<br>(42.3%) | 1,990<br>(41.2%) | 1,458<br>(43.3%) | 0.178 |
| Hypertension                          | 9,312<br>(87.8%) | 2,110<br>(87.8%) | 4,224<br>(87.5%) | 2,978<br>(88.4%) | 0.486 |
| Dyslipidemia                          | 6,056<br>(57.1%) | 1,065<br>(44.3%) | 2,870<br>(59.4%) | 2,121<br>(62.9%) | <.001 |
| Frailty                               | 2.02 ±<br>3.71   | 1.69 ±<br>3.11   | 1.99 ±<br>3.70   | 2.30 ±<br>4.08   | <.001 |
| <b>Prior Cardiac Procedure, N (%)</b> |                  |                  |                  |                  |       |
| CABG                                  | 899<br>(8.5%)    | 186<br>(7.7%)    | 427<br>(8.8%)    | 286<br>(8.5%)    | 0.282 |
| PCI                                   | 2,347<br>(22.1%) | 500<br>(20.8%)   | 947<br>(19.6%)   | 900<br>(26.7%)   | <.001 |
| Valve surgery                         | 716<br>(6.8%)    | 123<br>(5.1%)    | 295<br>(6.1%)    | 298<br>(8.8%)    | <.001 |
| Pacemaker                             | 591<br>(5.6%)    | 105<br>(4.4%)    | 267<br>(5.5%)    | 219<br>(6.5%)    | 0.002 |
| ICD                                   | 99<br>(0.9%)     | 13<br>(0.5%)     | 51<br>(1.1%)     | 35<br>(1.0%)     | 0.074 |
| Prior Stroke                          | 191<br>(1.8%)    | 27<br>(1.1%)     | 97<br>(2.0%)     | 67<br>(2.0%)     | 0.017 |
| <b>Status of Procedure, N (%)</b>     |                  |                  |                  |                  |       |
| Urgent                                | 1,766<br>(16.7%) | 338<br>(14.1%)   | 977<br>(20.2%)   | 451<br>(13.4%)   | <.001 |
| Elective                              | 8,836<br>(83.3%) | 2,066<br>(85.9%) | 3,851<br>(79.8%) | 2,919<br>(86.6%) | <.001 |
| Wait time (median days + IQR)         | 81<br>(37-140)   | 63<br>(28-110)   | 81<br>(35-135)   | 98<br>(51-168)   | <.001 |
| <b>Complications, N (%)</b>           |                  |                  |                  |                  |       |
| Acute kidney injury                   | 191<br>(1.8%)    | 36<br>(1.5%)     | 68<br>(1.4%)     | 87<br>(2.6%)     | <.001 |
| Dialysis                              | 226<br>(2.1%)    | 31<br>(1.3%)     | 91<br>(1.9%)     | 104<br>(3.1%)    | <.001 |
| Bleeding                              | 765<br>(7.2%)    | 143<br>(5.9%)    | 372<br>(7.7%)    | 250<br>(7.4%)    | 0.021 |
| Stroke/TIA                            | 191<br>(1.8%)    | 20<br>(0.8%)     | 90<br>(1.9%)     | 81<br>(2.4%)     | <.001 |
| Pacemaker during hospitalization      | 774<br>(7.3%)    | 159<br>(6.6%)    | 340<br>(7.0%)    | 275<br>(8.2%)    | <.001 |

|                                                |                     |                     |                     |                     |       |
|------------------------------------------------|---------------------|---------------------|---------------------|---------------------|-------|
| ICD                                            | 37<br>(0.3%)        | 7<br>(0.3%)         | 17<br>(0.4%)        | 13<br>(0.4%)        | 0.834 |
| CRT-P                                          | 39<br>(0.4%)        | 12<br>(0.5%)        | 18<br>(0.4%)        | 9<br>(0.3%)         | 0.356 |
| CRT-D                                          | 52<br>(0.5%)        | 13<br>(0.5%)        | 25<br>(0.5%)        | 14<br>(0.4%)        | 0.746 |
| Length of stay (median days + IQR)             | 6<br>(3-10)         | 5<br>(4-9)          | 6<br>(3-11)         | 5<br>(2-8)          | <.001 |
| <b>Hospital factors</b>                        |                     |                     |                     |                     |       |
| Total acute care hospital beds (mean $\pm$ SD) | 455.64 $\pm$ 222.32 | 299.82 $\pm$ 73.70  | 442.16 $\pm$ 251.64 | 586.09 $\pm$ 162.21 | <.001 |
| Total number of procedures (mean $\pm$ SD)     | 575.84 $\pm$ 178.54 | 400.32 $\pm$ 195.71 | 637.10 $\pm$ 133.30 | 613.29 $\pm$ 136.97 | <.001 |
| Teaching hospital                              | 8,303<br>(78.3%)    | 920<br>(38.3%)      | 4,013<br>(83.1%)    | 3,370<br>(100.0%)   | <.001 |

\*To death or end of study. TAVI: transcatheter aortic valve implantation. SAVR: surgical aortic valve replacement. SD: standard deviation. COPD: chronic obstructive pulmonary disease.

CABG: coronary artery bypass graft. PCI: percutaneous coronary intervention. ICD: implantable cardioverter-defibrillator. CRT-P: cardiac resynchronization therapy pacemaker. CRT-D: cardiac resynchronization therapy defibrillator

**Table S2:** Median odds ratio and variance partition coefficients of cox proportional models for receipt of TAVR instead of SAVR

|                                                | <b>VPC</b> | <b>MOR (95% CrI)</b> |
|------------------------------------------------|------------|----------------------|
| Null model                                     | 0.13       | 1.93 (1.55 – 3.02)   |
| Patient factors                                | 0.16       | 2.12 (1.66 – 3.68)   |
| Patient + Hospital factors                     | 0.23       | 2.56 (1.86 – 4.9)    |
| Patient + Hospital factors + Year of procedure | 0.28       | 2.94 (2.03 – 6.23)   |

VPC: variance partition coefficient. MOR: median odds ratio. CrI: credibility interval

**Table S3:** 80% interval odds ratio (IOR-80) of hospital factors from cox proportional models for receipt of TAVR instead of SAVR adjusted for patient, hospital factors and year of procedure

| <b>Hospital factors</b>           | <b>IOR-80</b> |
|-----------------------------------|---------------|
| Acute care hospital beds (per 50) | 0.15—8.44     |
| Number of procedures (per 100)    | 0.09—4.93     |
| Teaching hospital                 | 0.57—31.65    |

**Table S4:** Baseline characteristics by type of procedure for aortic stenosis (patients who received isolated SAVR only)

| Baseline Characteristic             | Total<br>N=8,170     | TAVR<br>N=5,025     | SAVR<br>N=3,145     | P-value |
|-------------------------------------|----------------------|---------------------|---------------------|---------|
| <b>Demographic characteristics</b>  |                      |                     |                     |         |
| Age (mean $\pm$ SD)                 | 76.65 $\pm$<br>10.42 | 81.57 $\pm$<br>7.43 | 68.77 $\pm$<br>9.63 | <.001   |
| Sex (% female)                      | 3,429<br>(42.0%)     | 2,172<br>(43.2%)    | 1,257<br>(40.0%)    | 0.004   |
| Rural Residence, N (%)              | 1,161<br>(14.2%)     | 568<br>(11.3%)      | 593<br>(18.9%)      | <.001   |
| Income quintile , N (%)             |                      |                     |                     | 0.258   |
| 1                                   | 1,599<br>(19.6%)     | 1,011<br>(20.1%)    | 588<br>(18.7%)      |         |
| 2                                   | 1,772<br>(21.7%)     | 1,101<br>(21.9%)    | 671<br>(21.3%)      |         |
| 3                                   | 1,639<br>(20.1%)     | 1,018<br>(20.3%)    | 621<br>(19.7%)      |         |
| 4                                   | 1,516<br>(18.6%)     | 898<br>(17.9%)      | 618<br>(19.7%)      |         |
| 5                                   | 1,621<br>(19.8%)     | 984<br>(19.6%)      | 637<br>(20.3%)      |         |
| <b>Medical Comorbidities, N (%)</b> |                      |                     |                     |         |
| Congestive Heart Failure            | 4,342<br>(53.1%)     | 3,319<br>(66.0%)    | 1,023<br>(32.5%)    | <.001   |
| Cardiac arrhythmia                  | 1,654<br>(20.2%)     | 1,298<br>(25.8%)    | 356<br>(11.3%)      | <.001   |
| Peripheral vascular disease         | 255<br>(3.1%)        | 217<br>(4.3%)       | 38<br>(1.2%)        | <.001   |
| Cerebrovascular disease             | 289<br>(3.5%)        | 218<br>(4.3%)       | 71<br>(2.3%)        | <.001   |
| COPD                                | 2,469<br>(30.2%)     | 1,752<br>(34.9%)    | 717<br>(22.8%)      | <.001   |
| Dementia                            | 379<br>(4.6%)        | 347<br>(6.9%)       | 32<br>(1.0%)        | <.001   |
| Cancer                              | 517<br>(6.3%)        | 379<br>(7.5%)       | 138<br>(4.4%)       | <.001   |
| Dialysis                            | 221<br>(2.7%)        | 167<br>(3.3%)       | 54<br>(1.7%)        | <.001   |
| Interstitial lung disease           | 79<br>(1.0%)         | 64<br>(1.3%)        | 15<br>(0.5%)        | <.001   |

|                                       |                  |                  |                  |       |
|---------------------------------------|------------------|------------------|------------------|-------|
| Liver disease                         | 137<br>(1.7%)    | 101<br>(2.0%)    | 36<br>(1.1%)     | 0.003 |
| Renal disease                         | 459<br>(5.6%)    | 393<br>(7.8%)    | 66<br>(2.1%)     | <.001 |
| Diabetes                              | 3,341<br>(40.9%) | 2,201<br>(43.8%) | 1,140<br>(36.2%) | <.001 |
| Hypertension                          | 7,159<br>(87.6%) | 4,693<br>(93.4%) | 2,466<br>(78.4%) | <.001 |
| Dyslipidemia                          | 4,683<br>(57.3%) | 3,177<br>(63.2%) | 1,506<br>(47.9%) | <.001 |
| Frailty                               | 2.20 ±<br>3.96   | 2.90 ±<br>4.51   | 1.09 ±<br>2.49   | <.001 |
| <b>Prior Cardiac Procedure, N (%)</b> |                  |                  |                  |       |
| CABG                                  | 841<br>(10.3%)   | 796<br>(15.8%)   | 45<br>(1.4%)     | <.001 |
| PCI                                   | 1,896<br>(23.2%) | 1,625<br>(32.3%) | 271<br>(8.6%)    | <.001 |
| Valve surgery                         | 659<br>(8.1%)    | 542<br>(10.8%)   | 117<br>(3.7%)    | <.001 |
| Pacemaker                             | 541<br>(6.6%)    | 473<br>(9.4%)    | 68<br>(2.2%)     | <.001 |
| ICD                                   | 89<br>(1.1%)     | 77<br>(1.5%)     | 12<br>(0.4%)     | <.001 |
| Prior Stroke                          | 153<br>(1.9%)    | 115<br>(2.3%)    | 38<br>(1.2%)     | <.001 |
| <b>Status of Procedure, N (%)</b>     |                  |                  |                  |       |
| Urgent                                | 1,141<br>(14.0%) | 739<br>(14.7%)   | 402<br>(12.8%)   |       |
| Elective                              | 7,029<br>(86.0%) | 4,286<br>(85.3%) | 2,743<br>(87.2%) | 0.015 |
| Wait time (median days + IQR)         | 81<br>(37-140)   | 114<br>(64-180)  | 57<br>(24-101)   | <.001 |
| <b>Complications, N (%)</b>           |                  |                  |                  |       |
| Acute kidney injury                   | 191<br>(1.8%)    | 86<br>(1.7%)     | 105<br>(1.9%)    | 0.508 |
| Dialysis                              | 226<br>(2.1%)    | 111<br>(2.2%)    | 115<br>(2.1%)    | 0.601 |
| Bleeding                              | 765<br>(7.2%)    | 373<br>(7.4%)    | 392<br>(7.0%)    | 0.434 |
| Stroke/TIA                            | 191<br>(1.8%)    | 100<br>(2.0%)    | 91<br>(1.6%)     | 0.166 |
| Pacemaker during hospitalization      | 774<br>(7.3%)    | 513<br>(10.2%)   | 261<br>(4.7%)    | <.001 |



|                                              |                    |                    |                    |       |
|----------------------------------------------|--------------------|--------------------|--------------------|-------|
| ICD                                          | 37<br>(0.3%)       | 19<br>(0.4%)       | 18<br>(0.3%)       | 0.629 |
| CRT-P                                        | 39<br>(0.4%)       | 23<br>(0.5%)       | 16<br>(0.3%)       | 0.147 |
| CRT-D                                        | 52<br>(0.5%)       | 28<br>(0.6%)       | 24<br>(0.4%)       | 0.35  |
| <b>Postoperative outcomes, N (%)</b>         |                    |                    |                    |       |
| Length of stay (median days + IQR)           | 6<br>(3-10)        | 3<br>(1-7)         | 7<br>(5-11)        | <.001 |
| 30-day all cause readmission                 | 842<br>(10.3%)     | 539<br>(10.7%)     | 303<br>(9.6%)      | 0.114 |
| 90-day all cause readmission                 | 1,435<br>(17.6%)   | 972<br>(19.3%)     | 463<br>(14.7%)     | <.001 |
| All-cause readmission to maximum follow-up   | 4,553<br>(42.9%)   | 2,469<br>(49.1%)   | 2,084<br>(37.4%)   | <.001 |
| 30-day all cause mortality                   | 167<br>(2.0%)      | 122<br>(2.4%)      | 45<br>(1.4%)       | 0.002 |
| 90-day all cause mortality                   | 276<br>(3.4%)      | 219<br>(4.4%)      | 57<br>(1.8%)       | <.001 |
| Overall mortality to maximum follow-up       | 1,425<br>(13.4%)   | 929<br>(18.5%)     | 496<br>(8.9%)      | <.001 |
| Follow-up from procedure*(median days + IQR) | 657<br>(333-1,062) | 515<br>(259-876)   | 811<br>(453-1,177) | <.001 |
| <b>Hospital factors</b>                      |                    |                    |                    |       |
| Total acute care hospital beds               | 455.64 ±<br>222.32 | 472.33 ±<br>213.79 | 440.59 ±<br>228.71 | <.001 |
| Total number of procedures                   | 575.84 ±<br>178.54 | 569.77 ±<br>175.81 | 581.31 ±<br>180.81 | <.001 |

\*To death or end of study. TAVI: transcatheter aortic valve implantation. SAVR: surgical aortic

valve replacement. SD: standard deviation. COPD: chronic obstructive pulmonary disease.

CABG: coronary artery bypass graft. PCI: percutaneous coronary intervention. ICD: implantable cardioverter-defibrillator. CRT-P: cardiac resynchronization therapy pacemaker. CRT-D: cardiac resynchronization therapy defibrillator. IQR: interquartile range. TIA: transient ischemic attack.

**Table S5:** Baseline characteristics by type of procedure for aortic stenosis (patients without a previous open heart operation)

| <b>Baseline Characteristic</b>      | <b>Total<br/>N=10,602</b> | <b>TAVR<br/>N=5,025</b> | <b>SAVR<br/>N=5,577</b> | <b>P-value</b> |
|-------------------------------------|---------------------------|-------------------------|-------------------------|----------------|
| <b>Demographic characteristics</b>  |                           |                         |                         |                |
| Age (mean $\pm$ SD)                 | 75.70 $\pm$<br>10.10      | 81.57 $\pm$<br>7.43     | 70.40 $\pm$<br>9.22     | <.001          |
| Sex (% female)                      | 3,972<br>(37.5%)          | 2,172<br>(43.2%)        | 1,800<br>(32.3%)        | <.001          |
| Rural Residence, N (%)              | 1,571<br>(14.8%)          | 568<br>(11.3%)          | 1,003<br>(18.0%)        | <.001          |
| Income quintile, N (%)              |                           |                         |                         | 0.003          |
| 1                                   | 2,031<br>(19.2%)          | 1,011<br>(20.1%)        | 1,020<br>(18.3%)        |                |
| 2                                   | 2,262<br>(21.3%)          | 1,101<br>(21.9%)        | 1,161<br>(20.8%)        |                |
| 3                                   | 2,109<br>(19.9%)          | 1,018<br>(20.3%)        | 1,091<br>(19.6%)        |                |
| 4                                   | 2,043<br>(19.3%)          | 898<br>(17.9%)          | 1,145<br>(20.5%)        |                |
| 5                                   | 2,127<br>(20.1%)          | 984<br>(19.6%)          | 1,143<br>(20.5%)        |                |
| <b>Medical Comorbidities, N (%)</b> |                           |                         |                         |                |
| Congestive Heart Failure            | 5,167<br>(48.7%)          | 3,319<br>(66.0%)        | 1,848<br>(33.1%)        | <.001          |
| Cardiac arrhythmia                  | 1,986<br>(18.7%)          | 1,298<br>(25.8%)        | 688<br>(12.3%)          | <.001          |
| Peripheral vascular disease         | 313<br>(3.0%)             | 217<br>(4.3%)           | 96<br>(1.7%)            | <.001          |
| Cerebrovascular disease             | 357<br>(3.4%)             | 218<br>(4.3%)           | 139<br>(2.5%)           | <.001          |
| COPD                                | 3,067<br>(28.9%)          | 1,752<br>(34.9%)        | 1,315<br>(23.6%)        | <.001          |
| Dementia                            | 435<br>(4.1%)             | 347<br>(6.9%)           | 88<br>(1.6%)            | <.001          |
| Cancer                              | 631<br>(6.0%)             | 379<br>(7.5%)           | 252<br>(4.5%)           | <.001          |
| Dialysis                            | 268<br>(2.5%)             | 167<br>(3.3%)           | 101<br>(1.8%)           | <.001          |
| Interstitial lung disease           | 92<br>(0.9%)              | 64<br>(1.3%)            | 28<br>(0.5%)            | <.001          |

|                                       |                  |                             |                            |       |
|---------------------------------------|------------------|-----------------------------|----------------------------|-------|
| Liver disease                         | 167<br>(1.6%)    | 101<br>(2.0%)               | 66<br>(1.2%)               | <.001 |
| Renal disease                         | 534<br>(5.0%)    | 393<br>(7.8%)               | 141<br>(2.5%)              | <.001 |
| Diabetes                              | 4,465<br>(42.1%) | 2,201<br>(43.8%)            | 2,264<br>(40.6%)           | <.001 |
| Hypertension                          | 9,312<br>(87.8%) | 4,693<br>(93.4%)            | 4,619<br>(82.8%)           | <.001 |
| Dyslipidemia                          | 6,056<br>(57.1%) | 3,177<br>(63.2%)            | 2,879<br>(51.6%)           | <.001 |
| Frailty                               | 2.02 ±<br>3.71   | 2.90 ±<br>4.51              | 1.23 ±<br>2.56             | <.001 |
| <b>Prior Cardiac Procedure, N (%)</b> |                  |                             |                            |       |
| CABG                                  | 899<br>(8.5%)    | 796<br>(15.8%)              | 103<br>(1.8%)              | <.001 |
| PCI                                   | 2,347<br>(22.1%) | 1,625<br>(32.3%)            | 722<br>(12.9%)             | <.001 |
| Valve surgery                         | 716<br>(6.8%)    | 542<br>(10.8%)              | 174<br>(3.1%)              | <.001 |
| Pacemaker                             | 591<br>(5.6%)    | 473<br>(9.4%)               | 118<br>(2.1%)              | <.001 |
| ICD                                   | 99<br>(0.9%)     | 77<br>(1.5%)                | 22<br>(0.4%)               | <.001 |
| Prior Stroke                          | 191<br>(1.8%)    | <b>115</b><br><b>(2.3%)</b> | <b>76</b><br><b>(1.4%)</b> | <.001 |
| <b>Status of Procedure, N (%)</b>     |                  |                             |                            |       |
| Urgent                                | 1,766<br>(16.7%) | 739<br>(14.7%)              | 1,027<br>(18.4%)           | <.001 |
| Elective                              | 8,836<br>(83.3%) | 4,286<br>(85.3%)            | 4,550<br>(81.6%)           | <.001 |
| Wait time (median days + IQR)         | 81<br>(37-140)   | 114<br>(64-180)             | 57<br>(24-101)             | <.001 |
| <b>Complications, N (%)</b>           |                  |                             |                            |       |
| Acute kidney injury                   | 191<br>(1.8%)    | 86<br>(1.7%)                | 105<br>(1.9%)              | 0.508 |
| Dialysis                              | 226<br>(2.1%)    | 111<br>(2.2%)               | 115<br>(2.1%)              | 0.601 |
| Bleeding                              | 765<br>(7.2%)    | 373<br>(7.4%)               | 392<br>(7.0%)              | 0.434 |
| Stroke/TIA                            | 191<br>(1.8%)    | 100<br>(2.0%)               | 91<br>(1.6%)               | 0.166 |
| Pacemaker during hospitalization      | 774<br>(7.3%)    | 513<br>(10.2%)              | 261<br>(4.7%)              | <.001 |

|                                              |                    |                    |                    |       |
|----------------------------------------------|--------------------|--------------------|--------------------|-------|
| ICD                                          | 37<br>(0.3%)       | 19<br>(0.4%)       | 18<br>(0.3%)       | 0.629 |
| CRT-P                                        | 39<br>(0.4%)       | 23<br>(0.5%)       | 16<br>(0.3%)       | 0.147 |
| CRT-D                                        | 52<br>(0.5%)       | 28<br>(0.6%)       | 24<br>(0.4%)       | 0.35  |
| <b>Postoperative outcomes, N (%)</b>         |                    |                    |                    |       |
| Length of stay (median days + IQR)           | 6 (3-10)           | 3 (1-7)            | 7 (5-11)           | <.001 |
| 30-day all cause readmission                 | 940<br>(10.2%)     | 414<br>(10.6%)     | 526<br>(9.8%)      | 0.228 |
| 90-day all cause readmission                 | 1,573<br>(17.0%)   | 747<br>(19.2%)     | 826<br>(15.5%)     | <.001 |
| All-cause readmission to maximum follow-up   | 4,553<br>(42.9%)   | 2,469<br>(49.1%)   | 2,084<br>(37.4%)   | <.001 |
| 30-day all cause mortality                   | 202<br>(2.2%)      | 100<br>(2.6%)      | 102<br>(1.9%)      | 0.034 |
| 90-day all cause mortality                   | 309<br>(3.3%)      | 171<br>(4.4%)      | 138<br>(2.6%)      | <.001 |
| Overall mortality to maximum follow-up       | 1,425<br>(13.4%)   | 929<br>(18.5%)     | 496<br>(8.9%)      | <.001 |
| Follow-up from procedure*(median days + IQR) | 657<br>(333-1,062) | 515<br>(259-876)   | 811<br>(453-1,177) | <.001 |
| <b>Hospital factors</b>                      |                    |                    |                    |       |
| Total acute care hospital beds               | 455.64 ±<br>222.32 | 472.33 ±<br>213.79 | 440.59 ±<br>228.71 | <.001 |
| Total number of procedures                   | 575.84 ±<br>178.54 | 569.77 ±<br>175.81 | 581.31 ±<br>180.81 | <.001 |

\*To death or end of study. TAVI: transcatheter aortic valve implantation. SAVR: surgical aortic valve replacement. SD: standard deviation. COPD: chronic obstructive pulmonary disease.

CABG: coronary artery bypass graft. PCI: percutaneous coronary intervention. ICD: implantable cardioverter-defibrillator. CRT-P: cardiac resynchronization therapy pacemaker. CRT-D: cardiac resynchronization therapy defibrillator. IQR: interquartile range. TIA: transient ischemic attack.

**Table S6:** Factors associated with the likelihood of receiving TAVR instead of SAVR among patients with aortic stenosis (patients who received isolated SAVR only)

| Variable                           | Odds Ratio | 95% CI        |
|------------------------------------|------------|---------------|
| <b>Demographic characteristics</b> |            |               |
| Age                                | 1.23       | 1.22 - 1.24   |
| Female sex                         | 1.31       | 1.13 - 1.51   |
| Rural Residence                    | 0.83       | 0.67 - 1.02   |
| Income quintile                    |            |               |
| 1                                  | Ref        |               |
| 2                                  | 1.03       | 0.82 - 1.3    |
| 3                                  | 1.01       | 0.8 - 1.28    |
| 4                                  | 0.8        | 0.63 - 1.01   |
| 5                                  | 0.92       | 0.72 - 1.16   |
| <b>Medical Comorbidities</b>       |            |               |
| Congestive Heart Failure           | 2.32       | 1.98 - 2.72   |
| Cardiac arrhythmia                 | 1.24       | 1.02 - 1.5    |
| Peripheral vascular disease        | 3.61       | 2.19 - 5.96   |
| Cerebrovascular disease            | 0.87       | 0.57 - 1.31   |
| COPD                               | 1.62       | 1.37 - 1.9    |
| Dementia                           | 3.88       | 2.44 - 6.17   |
| Cancer                             | 1.27       | 0.94 - 1.72   |
| Dialysis                           | 1.86       | 1.1 - 3.14    |
| Interstitial lung disease          | 1.89       | 0.79 - 4.48   |
| Liver disease                      | 4.95       | 2.8 - 8.73    |
| Renal disease                      | 2.08       | 1.34 - 3.23   |
| Diabetes                           | 1.11       | 0.96 - 1.29   |
| Hypertension                       | 1.22       | 0.97 - 1.53   |
| Dyslipidemia                       | 0.92       | 0.8 - 1.07    |
| Frailty                            | 1.09       | 1.07 - 1.12   |
| <b>Prior Cardiac Procedure</b>     |            |               |
| CABG                               | 22.72      | 15.36 - 33.63 |
| PCI                                | 3.59       | 2.93 - 4.39   |
| Valve surgery                      | 3.41       | 2.47 - 4.7    |
| Pacemaker (includes CRT-P)         | 1.73       | 1.19 - 2.5    |
| ICD (includes CRT-D)               | 1.65       | 0.66 - 4.11   |
| <b>Hospital Factors</b>            |            |               |
| Acute care hospital beds           |            |               |
| Per 50                             | 1.09       | 0.93 - 1.28   |
| Number of procedures               |            |               |
| Per 100                            | 0.72       | 0.68 - 0.76   |
| Teaching Hospital                  | 3.8        | 0.68 - 21.28  |
| <b>Year of procedure</b>           |            |               |
| 2016                               | Ref        |               |
| 2017                               | 1.35       | 1.08 - 1.68   |
| 2018                               | 2.6        | 2.1 - 3.23    |
| 2019                               | 7.15       | 5.7 - 8.96    |

OR: odds ratio. COPD: chronic obstructive pulmonary disease. CABG: coronary artery bypass graft. PCI: percutaneous coronary intervention. ICD: implantable cardioverter-defibrillator.

CRT-P: cardiac resynchronization therapy pacemaker. CRT-D: cardiac resynchronization therapy defibrillator.

**Table S7:** Factors associated with the likelihood of receiving TAVR instead of SAVR among patients with aortic stenosis (patients without a previous open heart operation)

| Variable                           | Odds Ratio | 95% CI       |
|------------------------------------|------------|--------------|
| <b>Demographic characteristics</b> |            |              |
| Age                                | 1.24       | 1.22 - 1.25  |
| Female sex                         | 2.1        | 1.85 - 2.39  |
| Rural Residence                    | 0.83       | 0.69 - 1     |
| Income quintile                    |            |              |
| 1                                  | Ref        |              |
| 2                                  | 1.14       | 0.93 - 1.4   |
| 3                                  | 1.11       | 0.9 - 1.37   |
| 4                                  | 0.87       | 0.71 - 1.07  |
| 5                                  | 1.03       | 0.83 - 1.26  |
| <b>Medical Comorbidities</b>       |            |              |
| Congestive Heart Failure           | 2.11       | 1.84 - 2.42  |
| Cardiac arrhythmia                 | 1.28       | 1.09 - 1.52  |
| Peripheral vascular disease        | 2.47       | 1.68 - 3.62  |
| Cerebrovascular disease            | 0.99       | 0.7 - 1.41   |
| COPD                               | 1.66       | 1.45 - 1.91  |
| Dementia                           | 2.43       | 1.74 - 3.39  |
| Cancer                             | 1.27       | 0.98 - 1.65  |
| Dialysis                           | 2.11       | 1.34 - 3.32  |
| Interstitial lung disease          | 1.24       | 0.62 - 2.46  |
| Liver disease                      | 3.73       | 2.26 - 6.13  |
| Renal disease                      | 1.67       | 1.17 - 2.38  |
| Diabetes                           | 1.03       | 0.9 - 1.17   |
| Hypertension                       | 1.03       | 0.83 - 1.28  |
| Dyslipidemia                       | 0.83       | 0.73 - 0.95  |
| Frailty                            | 1.08       | 1.06 - 1.11  |
| <b>Prior Cardiac Procedure</b>     |            |              |
| PCI                                | 2.75       | 2.35 - 3.22  |
| Pacemaker (includes CRT-P)         | 1.94       | 1.42 - 2.65  |
| ICD (includes CRT-D)               | 1.58       | 0.71 - 3.53  |
| <b>Hospital Factors</b>            |            |              |
| Acute care hospital beds           |            |              |
| Per 50                             | 1.11       | 0.95 - 1.3   |
| Number of procedures               |            |              |
| Per 100                            | 0.68       | 0.64 - 0.72  |
| Teaching Hospital                  | 4.38       | 0.78 - 24.42 |
| <b>Year of procedure</b>           |            |              |
| 2016                               | Ref        |              |
| 2017                               | 1.5        | 1.23 - 1.82  |
| 2018                               | 2.78       | 2.3 - 3.36   |
| 2019                               | 7.53       | 6.18 - 9.17  |

OR: odds ratio. COPD: chronic obstructive pulmonary disease. CABG: coronary artery bypass graft. PCI: percutaneous coronary intervention. ICD: implantable cardioverter-defibrillator.

CRT-P: cardiac resynchronization therapy pacemaker. CRT-D: cardiac resynchronization therapy defibrillator.



**Table S8:** Median odds ratio and variance partition coefficients of Cox proportional models for receipt of TAVR instead of SAVR (patients who received isolated SAVR only)

|                                                | <b>VPC</b> | <b>MOR</b> |
|------------------------------------------------|------------|------------|
| Null model                                     | 0.09       | 1.75       |
| Patient factors                                | 0.13       | 1.95       |
| Patient + Hospital factors                     | 0.24       | 2.64       |
| Patient + Hospital factors + Year of procedure | 0.25       | 2.73       |

VPC: variance partition coefficient. MOR: median odds ratio.

**Table S9:** Median odds ratio and variance partition coefficients of Cox proportional models for receipt of TAVR instead of SAVR (patients without a previous open heart operation)

|                                                | <b>VPC</b> | <b>MOR</b> |
|------------------------------------------------|------------|------------|
| Null model                                     | 0.13       | 1.94       |
| Patient factors                                | 0.15       | 2.07       |
| Patient + Hospital factors                     | 0.24       | 2.66       |
| Patient + Hospital factors + Year of procedure | 0.25       | 2.73       |

VPC: variance partition coefficient. MOR: median odds ratio.

**Table S10:** Association between TAVR/SAVR ratios and clinical outcomes (patients who received isolated SAVR only).

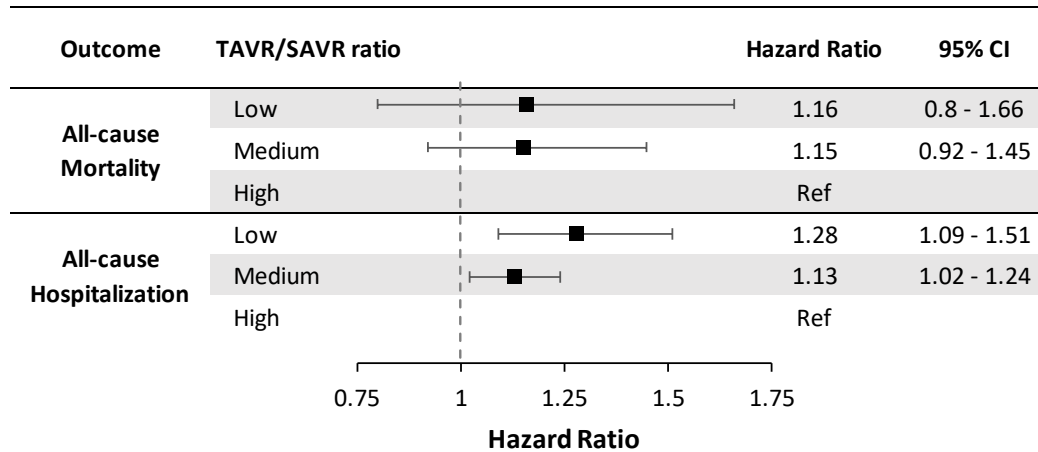

Models adjusted for patient and hospital factors, patients' admission status, hospital length of stay and in-hospital periprocedural complications. HR: hazard ratio.

**Table S11:** Association between TAVR/SAVR ratios and clinical outcomes (patients without a previous open heart operation).

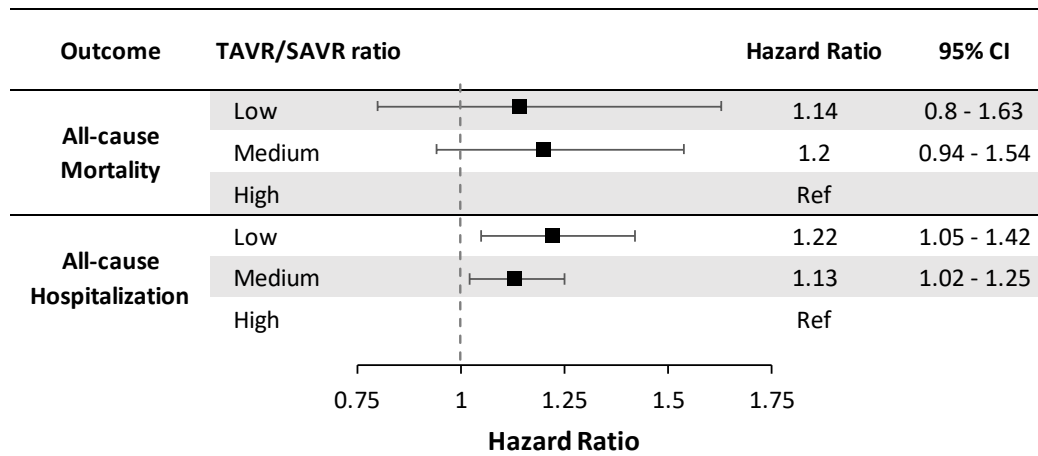

Models adjusted for patient and hospital factors, patients' admission status, hospital length of stay and in-hospital periprocedural complications. HR: hazard ratio.
